# Supplementary material for: Imine-Linked Polymer Based Nitrogen-Doped Porous Activated Carbon for Efficient and Selective CO2 Capture
Source: PubMed Central journal article supplement (PMC5153834; doi:10.1038/srep38614), 2016-12-13
Supplement: srep38614-s1.pdf [file srep38614-s1.pdf]

# Supporting Information

## **Imine-Linked Polymer Based Nitrogen-Doped Porous Activated Carbon for Efficient and Selective CO<sub>2</sub> Capture**

*Akram Alabadi<sup>1,2</sup>, Hayder A. Abbood<sup>3</sup>, Qingyin Li<sup>1</sup>, Ni Jing<sup>1</sup> and Bien Tan<sup>1,\*</sup>*

<sup>1</sup>School of Chemistry and Chemical Engineering, Huazhong University of Science and Technology, Luoyu Road No. 1037, Wuhan, 430074, China.

<sup>2</sup>South Refineries Company, Ministry of Oil, Basra, 61006, Iraq.

<sup>3</sup> Material Engineering Department, College of Engineering, University of Basrah, Basrah, 61006, Iraq.

\*Correspondence to [bien.tan@mail.hust.edu.cn](mailto:bien.tan@mail.hust.edu.cn)

## Heat of Adsorption Tabular Report

---

| Quantity Adsorbed<br>(cm <sup>3</sup> /g STP) | Slope   | Y-Intercept | Heat of Adsorption<br>(kJ/mol) | Uncertainty<br>(kJ/mol) |
|-----------------------------------------------|---------|-------------|--------------------------------|-------------------------|
| 1.0000                                        | -5202.1 | 20.968      | 43.253                         | 0.000                   |
| 2.4693                                        | -5195.7 | 20.956      | 43.223                         | 0.000                   |
| 4.7767                                        | -5063.3 | 20.750      | 43.154                         | 0.000                   |
| 6.1321                                        | -4909.5 | 20.445      | 43.082                         | 0.000                   |
| 7.2040                                        | -4900.9 | 20.427      | 43.048                         | 0.000                   |
| 9.2279                                        | -4898.0 | 20.421      | 42.924                         | 0.000                   |
| 10.4874                                       | -4777.9 | 20.188      | 42.903                         | 0.000                   |
| 10.9428                                       | -4678.5 | 20.015      | 42.899                         | 0.000                   |
| 11.9386                                       | -4670.3 | 19.998      | 42.831                         | 0.000                   |
| 13.1981                                       | -4591.4 | 19.866      | 42.756                         | 0.000                   |
| 13.3419                                       | -4581.7 | 19.848      | 42.634                         | 0.000                   |
| 14.5535                                       | -4507.3 | 19.714      | 42.476                         | 0.000                   |
| 14.6733                                       | -4500.7 | 19.703      | 42.220                         | 0.000                   |
| 15.9088                                       | -4438.3 | 19.605      | 42.042                         | 0.000                   |
| 17.2642                                       | -4368.7 | 19.483      | 41.923                         | 0.000                   |
| 17.4080                                       | -4361.2 | 19.469      | 41.861                         | 0.000                   |
| 17.4559                                       | -4358.7 | 19.464      | 41.740                         | 0.000                   |
| 18.6195                                       | -4298.5 | 19.351      | 41.647                         | 0.000                   |
| 19.9749                                       | -4233.1 | 19.229      | 41.595                         | 0.000                   |
| 20.1426                                       | -4225.1 | 19.214      | 41.429                         | 0.000                   |
| 21.3302                                       | -4167.2 | 19.099      | 41.418                         | 0.000                   |
| 21.5698                                       | -4155.4 | 19.075      | 41.349                         | 0.000                   |
| 22.6856                                       | -4101.0 | 18.963      | 41.307                         | 0.000                   |
| 22.8773                                       | -4091.9 | 18.944      | 41.282                         | 0.000                   |
| 24.0409                                       | -4040.0 | 18.840      | 41.190                         | 0.000                   |
| 25.3963                                       | -3984.5 | 18.732      | 41.029                         | 0.000                   |
| 25.6119                                       | -3976.5 | 18.717      | 40.962                         | 0.000                   |
| 25.6838                                       | -3973.9 | 18.712      | 40.841                         | 0.000                   |
| 26.7516                                       | -3938.6 | 18.651      | 40.747                         | 0.000                   |
| 28.1070                                       | -3901.3 | 18.597      | 40.637                         | 0.000                   |
| 28.3466                                       | -3895.2 | 18.589      | 40.587                         | 0.000                   |
| 29.4623                                       | -3868.0 | 18.553      | 40.681                         | 0.000                   |
| 29.7978                                       | -3860.3 | 18.543      | 40.596                         | 0.000                   |
| 30.8177                                       | -3837.7 | 18.516      | 40.408                         | 0.000                   |
| 31.0812                                       | -3832.0 | 18.509      | 40.361                         | 0.000                   |
| 32.1730                                       | -3807.9 | 18.478      | 40.251                         | 0.000                   |
| 33.5284                                       | -3776.2 | 18.432      | 40.197                         | 0.000                   |
| 33.8159                                       | -3769.1 | 18.420      | 40.038                         | 0.000                   |
| 33.9118                                       | -3766.7 | 18.416      | 39.958                         | 0.000                   |
| 34.8837                                       | -3740.9 | 18.371      | 39.903                         | 0.000                   |
| 36.2391                                       | -3708.1 | 18.317      | 39.830                         | 0.000                   |
| 36.5506                                       | -3701.4 | 18.307      | 39.775                         | 0.000                   |

---

|         |         |        |        |       |
|---------|---------|--------|--------|-------|
| 36.9544 | -3681.2 | 18.281 | 39.607 | 0.000 |
| 37.0257 | -3673.5 | 18.272 | 39.543 | 0.000 |
| 37.9498 | -3657.6 | 18.254 | 39.411 | 0.000 |
| 38.1852 | -3652.1 | 18.248 | 39.365 | 0.000 |
| 38.3051 | -3635.5 | 18.231 | 39.227 | 0.000 |
| 38.5199 | -3606.0 | 18.194 | 39.182 | 0.000 |
| 38.7397 | -3603.8 | 18.191 | 39.063 | 0.000 |
| 38.8545 | -3560.5 | 18.136 | 38.983 | 0.000 |
| 39.2537 | -3539.5 | 18.116 | 38.828 | 0.000 |
| 39.4892 | -3522.4 | 18.098 | 38.786 | 0.000 |
| 39.6239 | -3482.8 | 18.050 | 38.657 | 0.000 |
| 39.8676 | -3480.7 | 18.048 | 38.540 | 0.000 |
| 39.9585 | -3447.2 | 18.012 | 38.461 | 0.000 |
| 40.4816 | -3428.9 | 17.995 | 38.309 | 0.000 |
| 40.6932 | -3414.4 | 17.980 | 38.288 | 0.000 |
| 40.8278 | -3385.3 | 17.958 | 38.147 | 0.000 |
| 40.9956 | -3383.6 | 17.956 | 38.133 | 0.000 |
| 41.1625 | -3357.6 | 17.936 | 37.916 | 0.000 |
| 42.1095 | -3342.4 | 17.925 | 37.790 | 0.000 |
| 42.3971 | -3330.3 | 17.913 | 37.690 | 0.000 |

The Langmuir adsorption isotherm assumes that adsorption takes place at specific homogeneous sites and is the simplest and still the most useful method. The Langmuir equation can be written as (1):

$$q = \frac{q_m b_p}{1 + b_p} \quad (1)$$

Where  $q$  is the adsorbed quantity (mmol of CO<sub>2</sub> per g of NACs),  $p$  is the pressure of CO<sub>2</sub> in the bulk gas phase,  $q_m$  is the maximum adsorption capacity (mmol g<sup>-1</sup>) and  $b$  is the Langmuir constant (bar<sup>-1</sup>).

Langmuir, isotherm model parameters and correlation coefficients for adsorption of CO<sub>2</sub> on NACs samples.

| Samples | Langmuir parameters        |                        | R <sup>2</sup> |
|---------|----------------------------|------------------------|----------------|
|         | qm [mmol g <sup>-1</sup> ] | b [bar <sup>-1</sup> ] |                |
| NAC-600 | 13.72                      | 0.18                   | 0.997          |
| NAC-700 | 18.35                      | 0.09                   | 0.998          |
| NAC-800 | 20.23                      | 0.08                   | 0.999          |

The Freundlich isotherm is an empirical equation used to describe heterogeneous systems. The Freundlich equation can be given by (2):

$$q = K_F P^{n-1} \quad (2)$$

Where  $k_F$  is the Freundlich constant and  $n$  is the empirical constant associated with the adsorption driving force.

| Samples | Freundlich parameters         |      | $R^2$ |
|---------|-------------------------------|------|-------|
|         | $k_F$ [mmol g <sup>-1</sup> ] | 1/n  |       |
| NAC-600 | 1.46                          | 0.48 | 0.995 |
| NAC-700 | 2.32                          | 0.51 | 0.997 |
| NAC-800 | 2.71                          | 0.53 | 0.999 |
